# Supplementary material
Source: PubMed Central journal article supplement (PMC5570642)
Supplement: NIHMS870716-supplement-Supp_info.pdf [file NIHMS870716-supplement-Supp_info.pdf]

---

1 **Supplementary Material**

2 **SIRT3 Acts As a Negative Regulator of Autophagy Dictating Hepatocyte**

3 **Susceptibility to Lipotoxicity**

4 Songtao Li<sup>1,2,†</sup>, Xiaobing Dou<sup>1,3,†</sup>, Hua Ning<sup>2,5</sup>, Qing Song<sup>2</sup>, Wei Wei<sup>2</sup>, Ximei Zhang<sup>1</sup>,  
5 Chen Shen<sup>1</sup>, Jiaxin Li<sup>1</sup>, Changhao Sun<sup>2,5</sup>, Zhenyuan Song<sup>1,3,4</sup>

6

7 <sup>1</sup>Department of Kinesiology and Nutrition, University of Illinois at Chicago, Chicago,  
8 IL 60612

9 <sup>2</sup>Department of Nutrition and Food Hygiene, Public Health College, Harbin Medical  
10 University, Harbin, 150086, P. R. China

11 <sup>3</sup>College of Life Science, Zhejiang Chinese Medical University, Hangzhou, Zhejiang,  
12 310053, P. R. China

13 <sup>4</sup>Department of Pathology, University of Illinois, Medical Center, Chicago, IL 60612

14 <sup>5</sup>Research Institute of Food, Nutrition and Health, Sino-Russian Medical Research  
15 Center, Harbin Medical University, Harbin, 150086, P. R. China

16 † These authors contribute equally to this paper

17 **Corresponding author:**

18 Zhenyuan Song, Ph. D.

19 Department of Kinesiology and Nutrition

20 University of Illinois at Chicago

21 1919 W Taylor Street, RM 627

22 Chicago, IL 60612, USA

23 Phone: (312)-996-7892

24 Fax: (312)-413-0319

25 E-mail: [song2008@uic.edu](mailto:song2008@uic.edu)

---

Corresponding author: Zhenyuan Song, Ph. D. Department of Kinesiology and Nutrition, University of Illinois at Chicago, 1919 W Taylor Street, RM 627, Chicago, IL 60612, USA, Phone: (312)-996-7892, Fax: (312)-413-0319, E-mail: [song2008@uic.edu](mailto:song2008@uic.edu)

† These authors contribute equally to this paper

---

## 26 **Supplementary Methods**

### 27 *Animal Model and Experimental Protocol*

28 All animal studies were performed in accordance with the animal care committee at the  
29 University of Illinois at Chicago. All mice were fed *ad libitum*, and housed on a 12:12 h  
30 light: dark cycle at 25°C. Male SIRT3<sup>-/-</sup> mice and WT 129Sv mice (8-week of age) were  
31 purchased from Jackson Laboratory (Bar Harbor, ME), and maintained on a standard chow  
32 diet. Male C57BL/6 mice (8-week old, Jackson Laboratory, Bar Harbor, ME) were randomly  
33 assigned to normal diet, palm coil high-fat diet, and corn oil high-fat diet (Supplementary  
34 data Table 1). The liver-specific SIRT3 overexpression mice and corresponding control mice  
35 were generated via the injection of recombinant adeno-associated viral (AAV) serotype 8  
36 gene transfer vectors containing a liver-specific promoter combination (albumin promoter)  
37 with either mouse SIRT3 sequence or empty as vector control (Cyagen Biosciences Inc.,  
38 Guangzhou, China). Finally, there are 6 groups in total (n = 8 mice/group) and the animals  
39 were fed for 8 weeks. AAV8 vectors were administered by tail vein injection at a dose of  
40  $1 \times 10^{12}$  viral titer/mL in a total volume of 100  $\mu$ L/mice at the beginning of the experiment.  
41 Recombinant AAV8 vectors encoding mouse SIRT3 (NM\_022433.2) under the control of  
42 albumin promoter (a liver-specific promoter) were generated by Cyagen Biosciences Inc.  
43 (Guangzhou, China). A noncoding plasmid carrying only the albumin promoter was used to  
44 produce vector control particles. The overexpression efficiency was shown in Fig. 1D and  
45 Supplementary data, Fig. 30. Mice were sacrificed after 8-week of feeding. Plasma and liver  
46 were collected for analysis. Plasma alanine aminotransferase (ALT) content was determined  
47 by a commercial ALT kit (Thermo Fisher, Waltham, MA). Triglyceride was assayed using a

---

48 Triglycerides Assay Kit (Thermo Fisher, Waltham, MA). Liver redox state was detected  
49 using a commercial TBARS Kit (Nanjing Jiancheng Bioengineering Institute, Nanjing,  
50 China). Small pieces of liver were fixed immediately in 10% buffered formalin. After  
51 paraffin embedding, 5  $\mu\text{m}$  sections were deparaffinized in xylene and were rehydrated  
52 through a series of decreasing concentrations of ethanol. Sections were stained with  
53 hematoxylin and eosin (H&E).

#### 54 *Chemicals*

55 All chemicals were purchased from Sigma-Aldrich (Sigma-Aldrich, St. Louis, MO), unless  
56 otherwise specified. Actinomycin D was obtained from Solarbio (Beijing, China). PA- and  
57 SA-BSA conjugates were prepared as described previously <sup>(1)</sup>. Briefly, PA or SA was  
58 dissolved in ethanol and saponified with sodium hydroxide. The sodium salt was dried,  
59 re-suspended in saline and heated at 80°C until completely dissolved. While the solution was  
60 still warm, isovolumetric 20% (w/v) BSA was added and the mixture was stirred at 50°C for  
61 4 h to allow PA or SA to bind to BSA. The PA- or SA-BSA complex (3 mmol/L fatty acid:  
62 1.5 mmol/L BSA; molar ratio, 2:1) was then sterilized by filtering, and aliquoted for future  
63 use. In all the experiments, the control group was exposed to an equal amount of solvent (e.g.  
64 BSA, ethanol, DMSO).

#### 65 *Cell Culture*

66 The HepG2 cell line was obtained from the American Type Culture Collection (Manassas,  
67 VA). Cells were cultured in Dulbecco's Modified Eagle Medium (DMEM) containing 10%  
68 (v/v) fetal bovine serum, 100 U /ml penicillin, and 100  $\mu\text{g}$  /ml streptomycin at 37°C in a  
69 humidified O<sub>2</sub>/CO<sub>2</sub> (19:1) atmosphere.

---

70 Alpha mouse liver (AML)-12 hepatocyte culture was established from a mouse transgenic  
71 for human transforming growth factor  $\alpha$ , and was obtained from the American Type Culture  
72 Collection (ATCC, CRL-2254), and was cultured in Dulbecco's Modified Eagle Medium  
73 /Ham's Nutrient Mixture F-12, 1:1 (DMEM /F-12, Sigma-Aldrich, 051M8322) containing 10%  
74 (v/v) fetal bovine serum (PAA Laboratories, A15-701), 5 mg/ml insulin (Sigma-Aldrich,  
75 I9278), 5  $\mu$ g/ml transferrin (Sigma-Aldrich, T8158), 5 ng/ml selenium (Sigma-Aldrich,  
76 229865), 40 ng/ml dexamethasone (Sigma-Aldrich, D4902), 100 U/ml penicillin, and 100  
77  $\mu$ g/ml streptomycin (Life technologies, 15140-122) at 37°C in a humidified O<sub>2</sub>/CO<sub>2</sub> (95:5)  
78 atmosphere.

79 ***Establishment of stable human SIRT3 over-expression cell lines***

80 The eukaryotic expression vector plasmid pcDNA3.1<sup>+</sup>/hSIRT3 containing the human SIRT3  
81 gene sequence was kindly provided by Dr. Yu Wang (University of Hong Kong) <sup>(2)</sup>. HepG2  
82 cells grown to 80–90% confluence were transfected with 0.8  $\mu$ g/well of the expression  
83 vector pcDNA3.1<sup>+</sup>/hSIRT3 or empty vector control pcDNA3.1<sup>+</sup> (Invitrogen, Grand Island,  
84 NY) in 24-well plate using Lipofectamine 2000 reagent (Invitrogen, Grand Island, NY)  
85 following the manufacturer's guidelines. After 48 hours transfection, cells were trypsinized  
86 into 24-well plates at a ratio of 1:100 for monoclonal cell selection using 800  $\mu$ g/ml G418.  
87 The stable cell line was established and confirmed by both western blot analysis and Real  
88 Time PCR. SIRT3 over-expression cells and vector control cells were cultured in DMEM  
89 containing 10% (v/v) fetal bovine serum, 400  $\mu$ g/ml G418, 100 U/ml penicillin, and 100  
90  $\mu$ g/ml streptomycin at 37°C in a humidified O<sub>2</sub>/CO<sub>2</sub> (19:1) atmosphere.

91 ***MnSOD Overexpression***

---

92 Recombinant lentivirus vector (pLV[Exp]-EGFP:T2A:Neo) containing human MnSOD  
93 (NM\_001024465.1) under the control of EF-1alpha promoter was generated by Cyagen  
94 Biosciences Inc. (Guangzhou, China). A noncoding vector carrying the EF1alpha promoter  
95 was used to produce vector control particles. The optimal virus titer used for cell transfection  
96 was screened according to the manufacturer's instructions. HepG2 cells were transfected  
97 with either pLV[Exp]-EGFP:T2A:Neo-EF1alpha-hMnSOD to overexpress MnSOD or  
98 pLV[Exp]-EGFP:T2A:Neo-EF1alpha-null as a vector control.

### 99 ***Cell Death Assays***

100  $2 \times 10^5$  /ml cells were seeded in 24-well plates and, after the indicated treatments, cell death  
101 was determined by measurement of LDH release, propidium iodide (PI) staining, or Hoechst  
102 staining. For LDH assay, culture medium was collected and detected using an LDH assay kit  
103 (Thermo Scientific Inc, VA) according to the manufacturer's instructions. For PI staining,  
104 cells were trypsinized and stained with PI staining solution (BD Pharmingen, CA) according  
105 to the manufacturer's instructions. Fluorescence was measured by flow cytometry (Accuri c6,  
106 BD, CA). For Hoechst staining, cells were stained with Hoechst staining solution (Beyotime  
107 Biotechnology, Nantong, China) according to the manufacturer's instructions and imaged by  
108 Nikon eclipse Ti-S fluorescence microscope (Nikon, Tokyo, Japan).

### 109 ***Analysis of GFP-LC3 puncta***

110 The recombinant adenovirus GFP-LC3 ( $1 \times 10^{10}$  viral titer/mL) was obtained from Hanbio  
111 Biotechnology Co. Ltd. (Shanghai, China). Cells were transiently transfected with  
112 recombinant adenovirus GFP-LC3 according to the manufacturer's instruction. Puncta was  
113 detected by a laser scanning confocal microscope (Nikon A1R, Japan) from at least 50 cells

---

114 for each individual experiment after different treatment.

115 ***Analysis of autophagic flux***

116 The autophagic flux was measured according to methods described previously <sup>(3)</sup>. The cells  
117 were pretreated with chloroquine (CQ), inhibitor of lysosome acidification, after genetically  
118 overexpressing or knocking-down SIRT3. The autophagic flux was determined via detecting  
119 GFP-LC3 puncta and LC3-II expression using laser scanning confocal microscope and  
120 Western blot, respectively. Additionally, cells were transiently transfected with recombinant  
121 adenovirus mRFP-GFP-LC3 (Hanbio Biotechnology Co. Ltd., Shanghai, China). Yellow or  
122 red puncta was detected by a laser scanning confocal microscope (Nikon A1R, Japan) from  
123 at least 50 cells for each individual experiment after different treatment.

124 ***Real Time-PCR***

125 Total RNA isolation, reverse transcription, and real time PCR were performed as described  
126 previously <sup>(4)</sup>. Briefly, total RNA from cultured cells was isolated with a phenol-chloroform  
127 extraction. For each sample, 1 µg total RNA was reverse-transcribed using a high-capacity  
128 cDNA reverse transcription kit (Applied Biosystems, Foster City, CA). The cDNA was  
129 amplified in MicroAmp Optical 96-well reaction plates with a SYBR Green PCR Master  
130 Mix (Applied Biosystems, Foster City, CA) on an Applied Biosystems Prism 7000 sequence  
131 detection system. Relative gene expression was calculated after normalization by a  
132 house-keeping gene (18S rRNA).

133 ***Western-blot Analysis***

134 Western-blot was performed as described previously <sup>(4)</sup> and the following antibodies  
135 were used: Anti-Sirt3, anti-phospho-AMPK, anti-AMPK, anti-phospho-Akt, anti-Akt,

---

136 anti-phospho-Erk1/2, anti-Erk1/2, anti-phospho-p70S6K, anti-p70S6K, anti-LC3B,  
137 anti-p62, anti-phospho-ACC, anti-ACC, anti-MnSOD, anti-acetylation, anti-COX IV,  
138 anti-caspase-3, anti-parp-1, anti-Atg5, and anti-beta-actin antibodies (Cell Signaling  
139 Technology, Danvers, MA).

#### 140 ***Immunoprecipitation***

141 Cells were lysed in an immunoprecipitation (IP) buffer (150 mM NaCl, 50 mM Tris-HCl, 1%  
142 Nonidet P-40, pH 7.8, and a mammalian cell-specific protease inhibitor cocktail. Total  
143 cellular extracts (200 µg of protein) were incubated with anti-MnSOD antibody (1 µg/ml) in  
144 IP buffer overnight at 4 °C on a rocker. The antibody-protein mixture was agitated at 150 rpm  
145 with Protein A/G agarose (Santa Cruz Biotechnology) for 1 hr at 4°C. The  
146 immunoprecipitates were washed four times with IP buffer. The washed immunoprecipitates  
147 were incubated in 50 µl of 1 × electrophoresis loading buffer and heated at 100 °C for 5 min.  
148 The beads were spun out and the supernatant was resolved by SDS-PAGE, and the  
149 modification of MnSOD by Sirt3 was analyzed by Western blot.

#### 150 ***RNA interference***

151 Cultured cells were transfected with human SIRT3 siRNA, human AMPK siRNA, human or  
152 Atg5 siRNA (Santa Cruz Biotechnology) using Lipofectamine 2000 according to the  
153 manufacturer's instructions. In the control group, cells were transfected with scrambled  
154 siRNA (Santa Cruz Biotechnology).

#### 155 ***Reactive oxygen species (ROS) detection***

156 The intracellular superoxide ( $O_2^{\cdot-}$ ) and hydrogen peroxide ( $H_2O_2$ ) were detected as  
157 described previously <sup>(5)</sup>. Briefly, hepatocytes were stained with DCFH-DA for the

---

158 measurement of H<sub>2</sub>O<sub>2</sub> after the indicated treatments. Intracellular O<sub>2</sub>'<sup>-</sup> was detected using a  
159 commercial Superoxide Detection kit (Enzo Life Science, NY) according to manufacturer's  
160 instructions. The fluorescent signal of listed ROS was collected by fluorescence microscope  
161 and flow cytometry.



162 **Supplemental Table**163 **Supplementary Table 1**

|                               | Normal diet | High-fat diet |          |
|-------------------------------|-------------|---------------|----------|
|                               |             | Palm oil      | Corn oil |
| Corn Starch (g/kg)            | 417.5       | 227.5         | 227.5    |
| Casein (g/kg)                 | 200         | 200           | 200      |
| Dextrinized cornstarch (g/kg) | 132         | 132           | 132      |
| Sucrose (g/kg)                | 100         | 100           | 100      |
| Palm oil (g/kg)               | -           | 190           | -        |
| Corn oil (g/kg)               | -           | -             | 190      |
| Soybean oil (g/kg)            | 50          | 50            | 50       |
| Fiber (g/kg)                  | 50          | 50            | 50       |
| Mineral mix(AIN-93G-MX, g/kg) | 35          | 35            | 35       |
| Vitamin mix(AIN-93G-MX, g/kg) | 10          | 10            | 10       |
| L-cystine (g/kg)              | 3           | 3             | 3        |
| Choline bitartrate (g/kg)     | 2.5         | 2.5           | 2.5      |
| Fat energy (kcal%)            | 11.7        | 45.0          | 45.0     |
| Carbohydrates energy (kcal%)  | 67.5        | 38.3          | 38.3     |
| Protein energy (kcal%)        | 20.8        | 16.7          | 16.7     |
| Total energy (kcal/kg)        | 3848        | 4798          | 4798     |

164

165

166 **Supplemental Figures**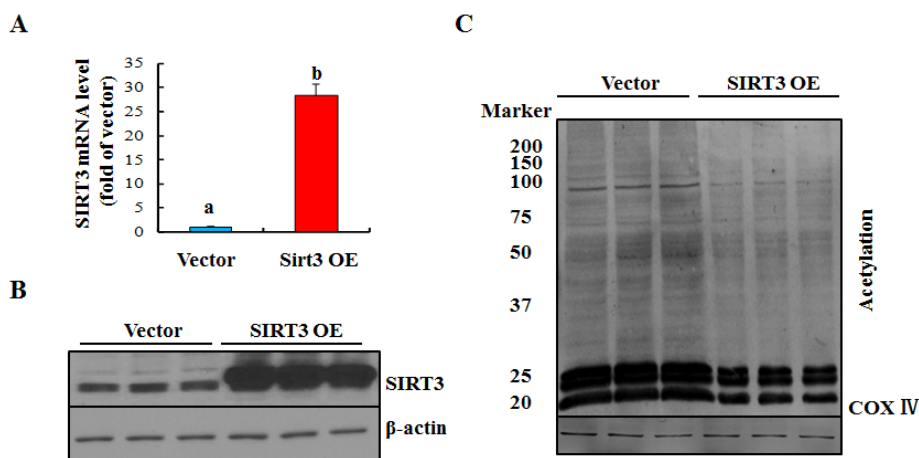

167

168 **Supplementary Fig. 1** Stable SIRT3-overexpressing (SIRT3 OE) hepatocyte cell line

169 was established in HepG2 cells. (A) SIRT3 mRNA level. (B) SIRT3 protein level. (C)

170 SIRT3 activity was detected by the assay of acetylated proteins abundance in the

171 mitochondrial fractions. All values are denoted as means  $\pm$  SD from three or more172 independent batches of cells. Bars with different characters differ significantly,  $p <$ 

173 0.05.

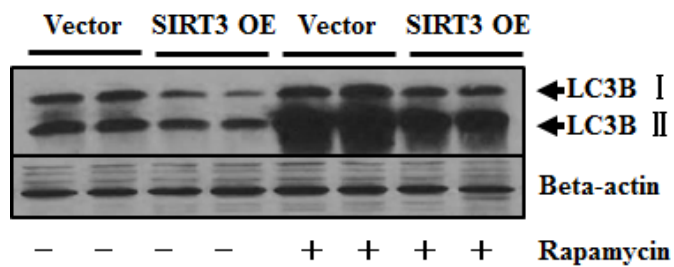

174

175 **Supplementary Fig. 2** SIRT3-overexpressing inhibites LC3-II formation with or

176 without autophagy activation. SIRT3 OE and vector control HepG2 cells were treated

177 with rapamycin for 12 h. LC3-II level was detected by Western-blotting.

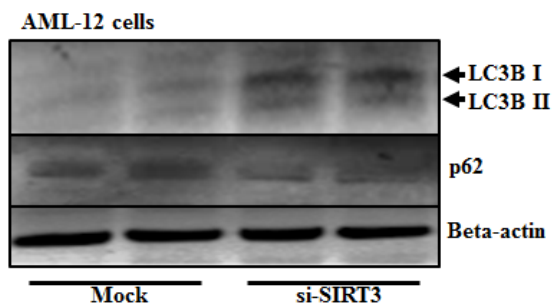

178

179 **Supplementary Fig. 3** Knocking-down SIRT3 stimulates autophagy in mouse

180 hepatocytes. AML-12 mouse hepatocytes were transfected with siSIRT3 or scramble

181 siRNA. Total lysates were subjected to immunoblotting assay for LC3 and p62.

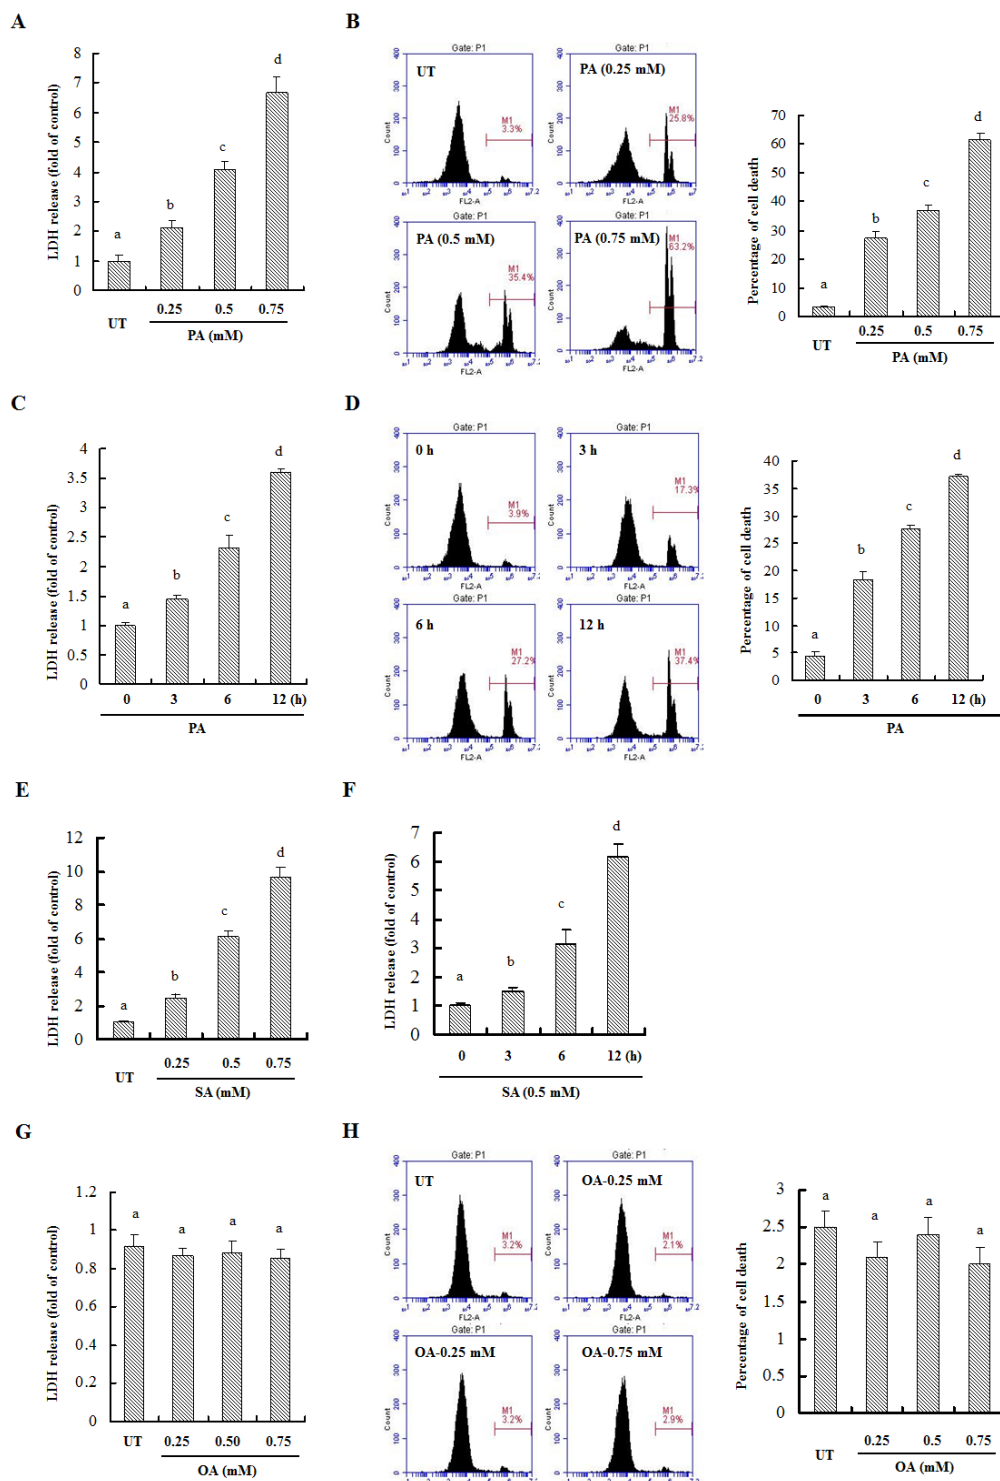

182

183 **Supplementary Fig. 4** SFAs induces cell death in hepatocytes. (A) & (B) HepG2 cells

184 were treated with 0.25, 0.5, 0.75 mM palmitic acid (PA) for 12 h. LDH release in the

185 culture medium and propidium iodide (PI) staining were detected according to the

---

186 description in the Material and methods, respectively. (C) & (D) HepG2 cells were  
187 treated with 0.5 mM (PA) for the indicated duration. LDH release in the culture  
188 medium and propidium iodide (PI) staining were detected according to the description  
189 in the Material and methods, respectively. (E) & (F) HepG2 cells were exposed to 0.5  
190 mM stearic acid (SA) for 12 h or as indicated in the figure. LDH release in the culture  
191 medium was detected according to the description in the Material and methods. (G) &  
192 (H) HepG2 cells were treated with 0.25, 0.5, 0.75 mM oleic acid (OA) for 12 h. LDH  
193 release in the culture medium and propidium iodide (PI) staining were detected  
194 according to the description in the Material and methods, respectively. All values are  
195 denoted as means  $\pm$  SD from three or more independent batches of cells. Bars with  
196 different characters differ significantly,  $p < 0.05$ .

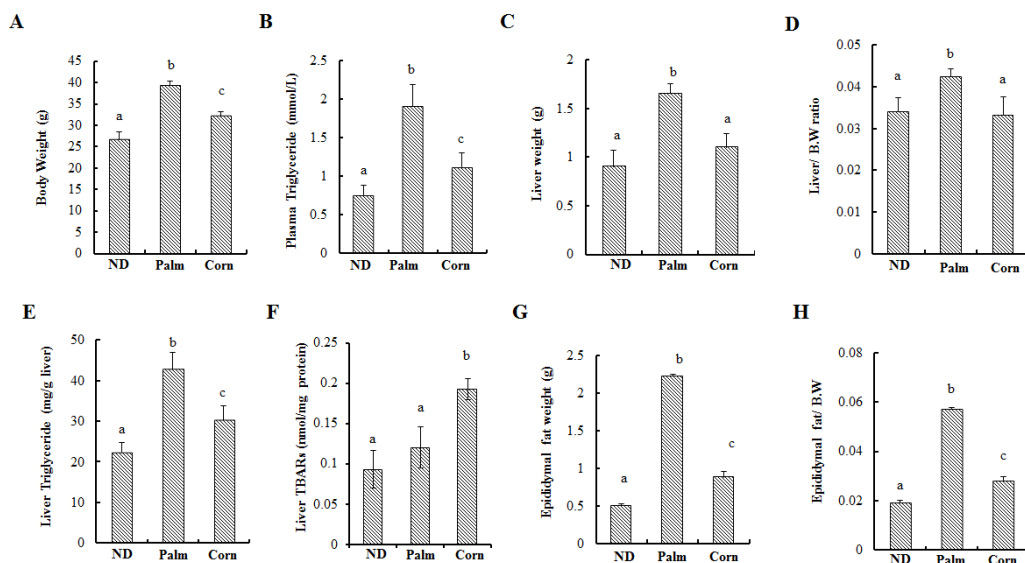

197

198 **Supplementary Fig. 5** SFAs-rich (palm oil) high-fat diet induces more severe

199 metabolic impairments than unsaturated fatty acids-rich (corn oil) high-fat diet in

200 C57BL/6 mice. Male C57BL/6 mice (8-week of age) were fed with normal or high-fat

201 diet using either palm oil or corn oil as fat source. Mice were sacrificed after 8-week

202 of feeding. Plasma and liver were collected for analysis. (A) Body weight. (B) Plasma

203 triglyceride was determined by a Triglycerides Assay Kit (Thermo Fisher, TR22421).

204 (C) Liver weight. (D) Liver weight/body weight ratio. (E) Liver triglyceride content.

205 (F) Liver TBARS. (G) Epididymal fat weight. (H) Epididymal fat/ body weight ratio.

206 All values are denoted as means  $\pm$  SD (n = 8). Bars with different characters differ207 significantly,  $p < 0.05$ .

208

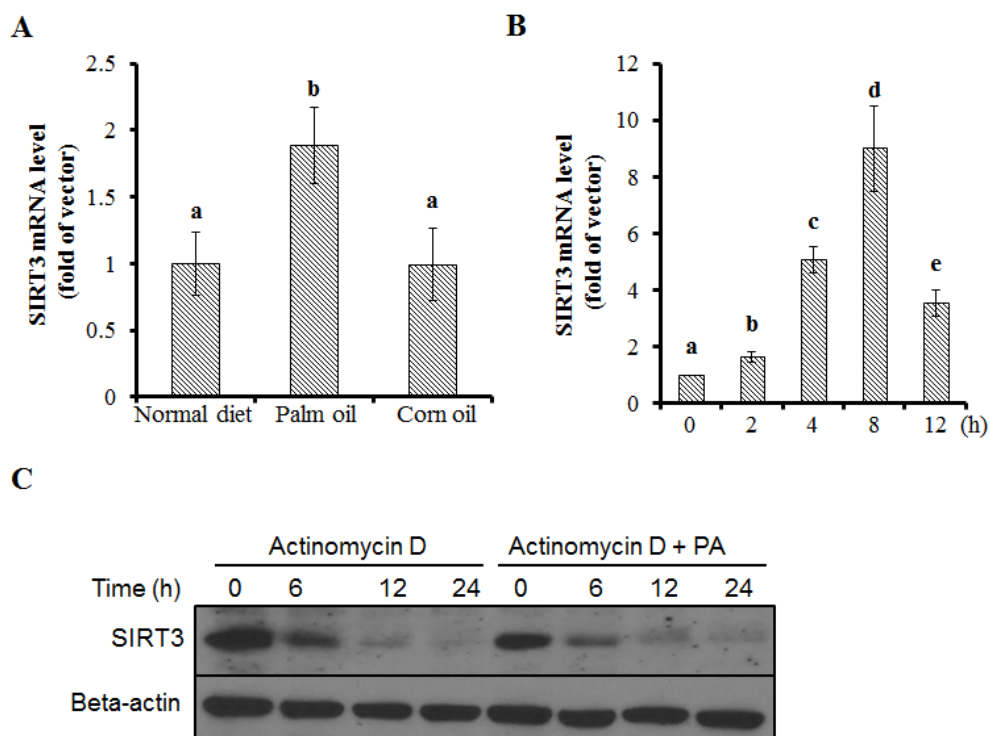

209

210 **Supplementary Fig. 6** SFAs up-regulates SIRT3 mRNA expression in the liver and

211 HepG2 cells. (A) Male C57BL/6 mice (8-week of age) were fed with normal or

212 high-fat diet using either palm oil or corn oil as fat source. Mice were sacrificed after

213 8-week of feeding. Liver mRNA was extracted for the analysis of SIRT3 mRNA level.

214 (B) HepG2 cells were treated with 0.5 mM PA for the indicated duration. The mRNA

215 expression of SIRT3 was detected by RT-PCR. (C) HepG2 cells treated with or

216 without 0.5 mM PA for the indicated duration in the presence of actinomycin D (5  $\mu$ g/217 ml). Immunoblotting assay was performed for SIRT3 expressions. Each *in vitro* test218 was performed at least three times ( $n = 8$  for mice), and a representative blot was219 shown. All values are denoted as means  $\pm$  SD. Bars with different characters differ220 significantly,  $p < 0.05$ .

221



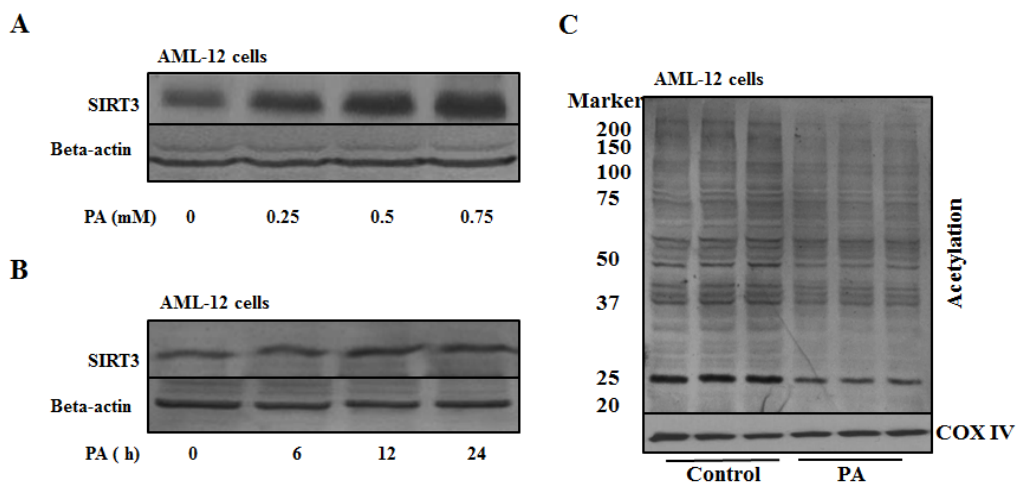

222

223 **Supplementary Fig. 7** Palmitate increases SIRT3 expression and activity in mouse

224 hepatocytes. (A) AML-12 cells were exposed to 0.25, 0.5, 0.75 mM palmitic acid (PA)

225 for 12 h. Total cellular lysates were subjected to immunoblotting assay for SIRT3. (B)

226 AML-12 cells were treated with 0.5 mM PA for the indicated duration. SIRT3

227 expression was detected. (C) AML-12 cells were incubated with 0.5 mM PA for 12 h.

228 Mitochondrial proteins were extracted using a commercial Mitochondria Isolation kit

229 (Beyotime, China) for the measurement of acetylated proteins degree.

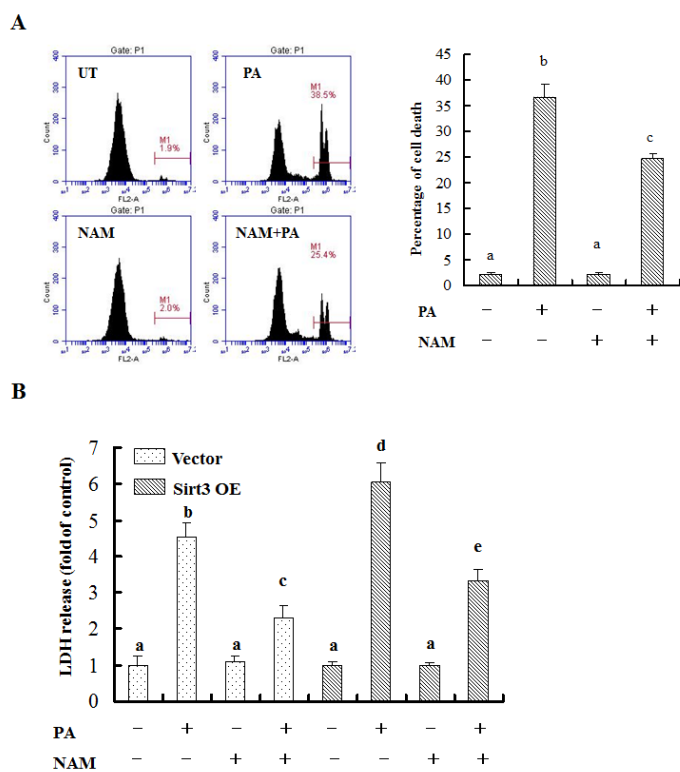

230

231 **Supplementary Fig. 8** Nicotinamide (NAM) protects hepatocytes against

232 palmitate-induced cell death. (A) HepG2 cells were treated with 0.5 mM palmitic acid

233 (PA) for 12 h with or without 1 h pre-incubation of 5 mM NAM. Cell death was

234 detected via propidium iodide (PI) staining using flow cytometry. (B) SIRT3 OE and

235 vector control HepG2 cells were treated with 0.5 mM PA for 12 h with or without 1 h

236 pre-incubation of NAM. Cell death was detected by the measurements of LDH release.

237 All values are denoted as means  $\pm$  SD from three or more independent batches of cells.238 Bars with different characters differ significantly,  $p < 0.05$ .

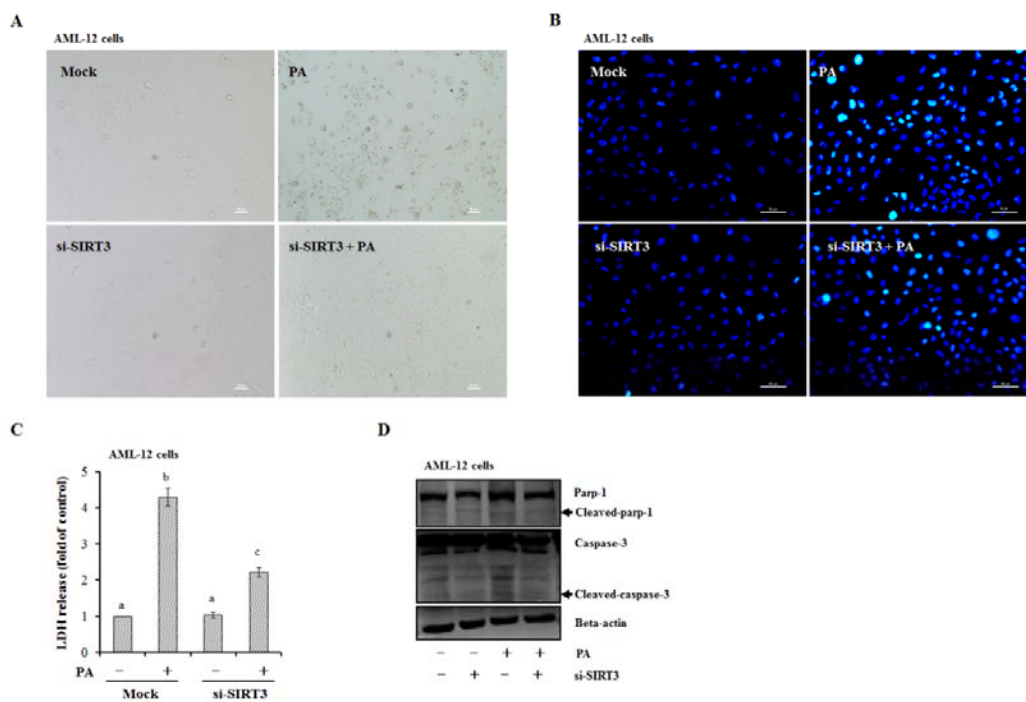

239

240 **Supplementary Fig. 9** Knocking-down SIRT3 protects palmitate-induced cell death in  
 241 mouse hepatocytes. AML-12 mouse hepatocytes were transfected with siSIRT3, and  
 242 exposed to palmitic acid (0.5 mM) treatment for 12 h. Cell death was determined by  
 243 the following assays. (A) Cellular morphological changes were examined by inverted  
 244 phase contrast microscope at a scope of 100 ×. (B) Nuclear morphology was detected  
 245 by Hoechst staining using fluorescence microscopy at a magnification of 200 ×. (C)  
 246 LDH release was detected as described in the Methods. (D) Total lysates were  
 247 subjected to immunoblotting assay for Caspase-3 and Parp-1. All values are denoted as  
 248 means ± SD from three or more independent batches of cells. Bars with different  
 249 characters differ significantly,  $p < 0.05$ .

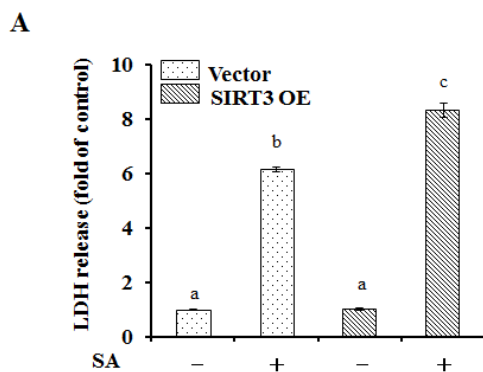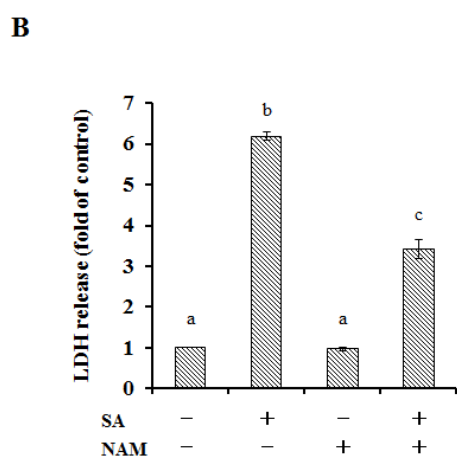

250

251 **Supplementary Fig. 10** SIRT3 overexpression aggravates stearic acid-induced cell

252 death. (A) Vector control or SIRT3 OE HepG2 cells were suffered to stearic acid (SA,

253 0.5 mM) exposure for 12 h. Cell death was detected by the measurements of LDH

254 release. (B) HepG2 cells were treated with 0.5 mM SA for 12 h with or without 1 h

255 pre-incubation of 5 mM NAM. Cell death was detected by the measurements of LDH

256 release. All values are denoted as means  $\pm$  SD from three or more independent batches257 of cells. Bars with different characters differ significantly,  $p < 0.05$ .

258

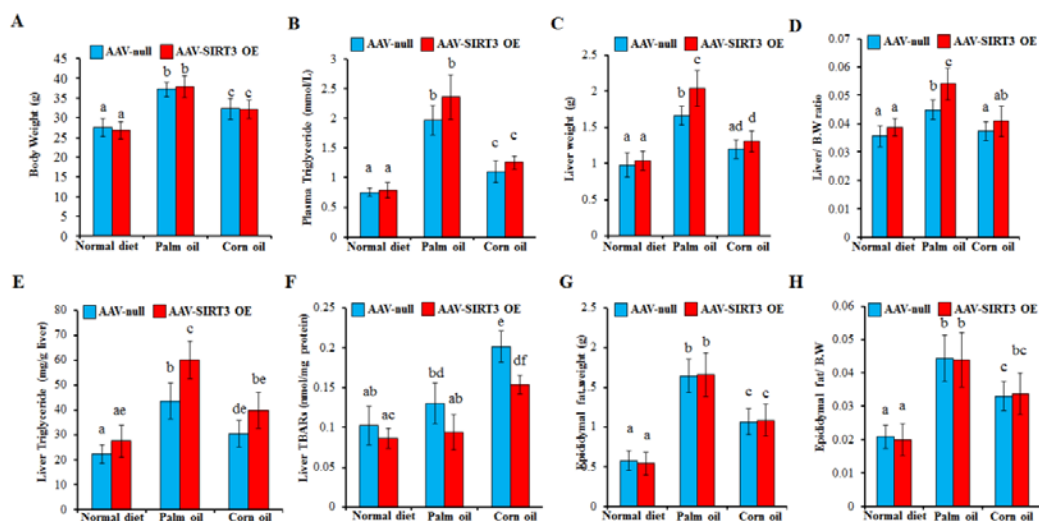

259

260 **Supplementary Fig. 11** SIRT3 overexpression aggravates SFAs-rich (palm oil)

261 high-fat diet induces metabolic impairments in C57BL/6 mice. Liver specific SIRT3

262 OE mice model was established and fed with normal or high-fat diet using either palm

263 oil or corn oil as described in the Methods. Plasma and liver were collected for

264 analysis (n = 8). (A) Body weight. (B) Plasma triglyceride was determined by a

265 Triglycerides Assay Kit (Thermo Fisher, TR22421). (C) Liver weight. (D) Liver

266 weight/body weight ratio. (E) Liver triglyceride content. (F) Liver TBARS. (G)

267 Epididymal fat weight. (H) Epididymal fat/ body weight ratio. All values are denoted

268 as means  $\pm$  SD (n = 8). Bars with different characters differ significantly,  $p < 0.05$ .

269

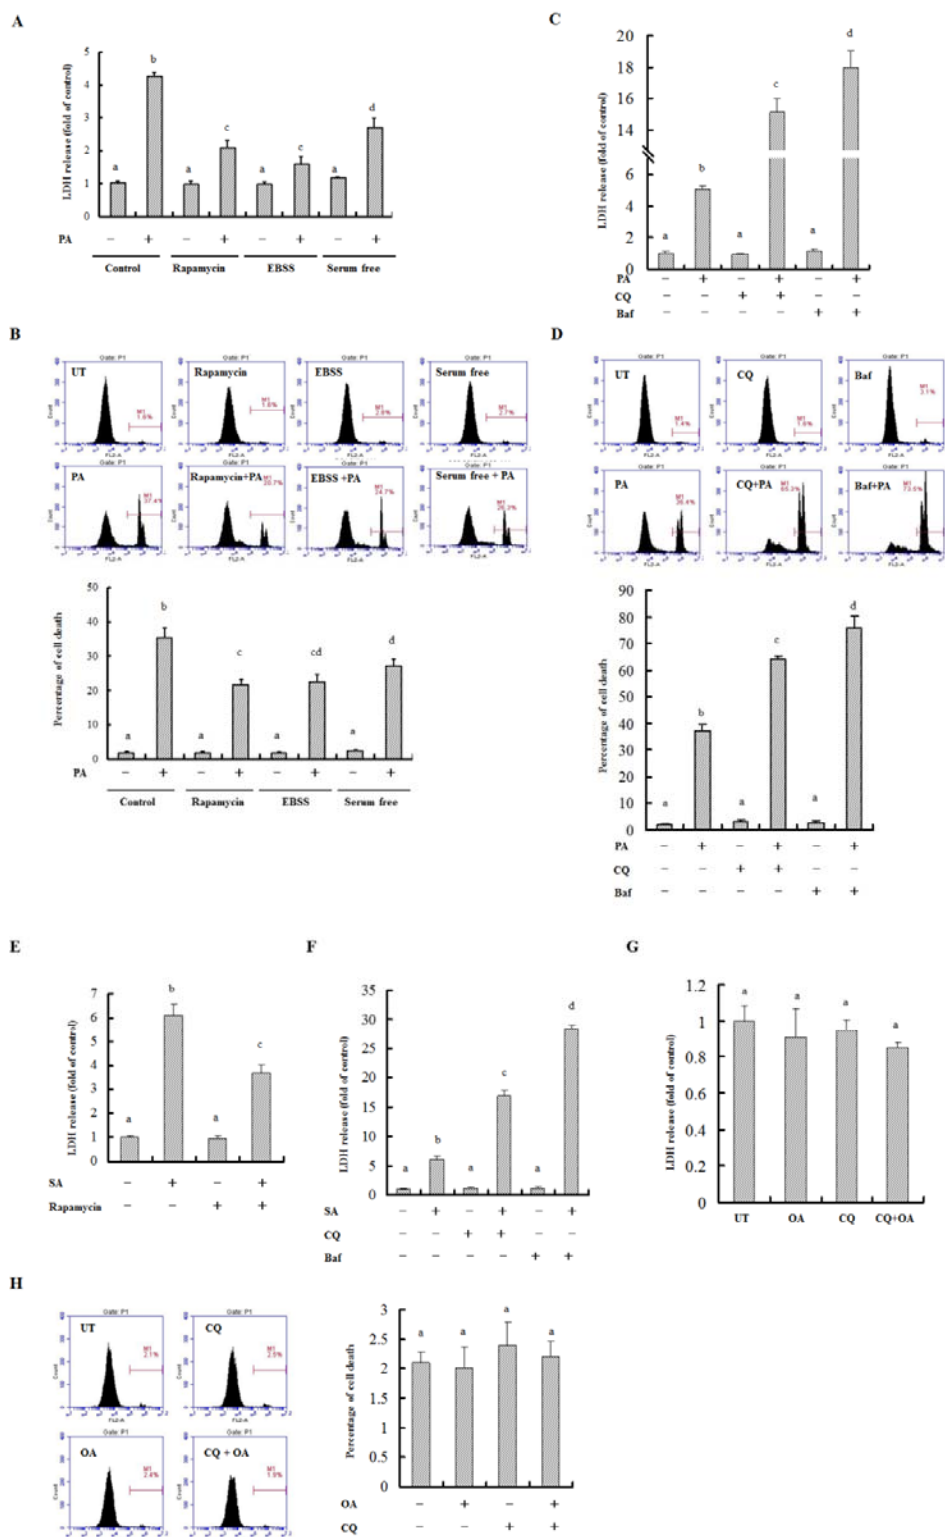

270

271 **Supplementary Fig. 12** Autophagy regulates SFAs-induced lipotoxicity in HepG2

272 cells. (A) &amp; (B) HepG2 cells were treated with 0.5 mM PA for 12 h in normal DMEM,

---

273 EBSS, or serum free DMEM culture medium, respectively. Rapamycin (50 nM) was  
274 added 1 h before PA treatment. Cell death was detected by the measurements of LDH  
275 release and propidium iodide (PI) staining using flow cytometry. (C) & (D) HepG2  
276 cells were treated with 0.5 mM PA for 12 h. Autophagy inhibitor, chloroquine (CQ, 20  
277  $\mu$ M) or bafilomycin A1 (Baf, 100 nM), was added 1 h before PA treatment,  
278 respectively. Cell death was detected by the measurements of LDH release and  
279 propidium iodide (PI) staining using flow cytometry. (E) & (F) HepG2 cells were  
280 treated with 0.5 mM SA for 12 h. Rapamycin, CQ, and Baf were added 1 h before SA  
281 treatment, respectively. Cell death was detected by the measurements of LDH release  
282 in the culture medium. (G) & (H) HepG2 cells were treated with 0.5 mM OA for 12 h.  
283 CQ was added 1 h before OA treatment. Cell death was detected by the measurements  
284 of LDH release and propidium iodide (PI) staining using flow cytometry. All values  
285 are denoted as means  $\pm$  SD from three or more independent batches of cells. Bars with  
286 different characters differ significantly,  $p < 0.05$ .  
287

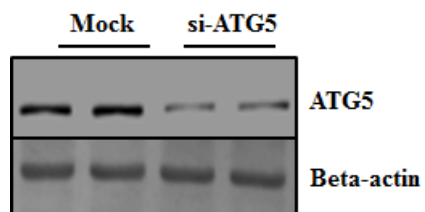

288

289 **Supplementary Fig. 13** Knocking-down efficiency of siRNA for Atg5. Special

290 siRNA for Atg5 was transfected into HepG2 cells as described in the Methods. Protein

291 expressions of Atg5 were detected for testing the silencing efficiency.

292



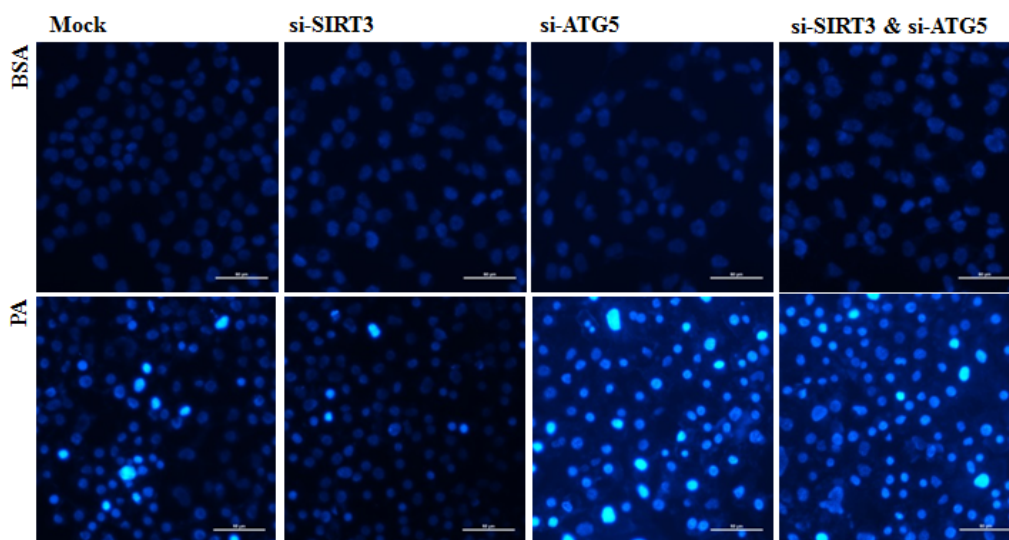

293

294 **Supplementary Fig. 14** Inhibiting autophagy blocks knocking-down SIRT3-protected

295 lipotoxicity in HepG2 cells. HepG2 cells were co-transfected with siRNA for SIRT3

296 and Atg5 siRNA, followed with 0.5 mM PA exposure for 12 h. Cell death was detected

297 by Hoechst staining.

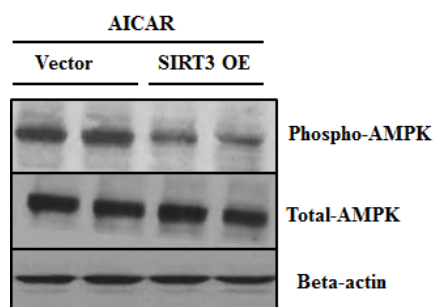

298

299 **Supplementary Fig. 15** SIRT3-overexpressing decreases AICAR-activated AMPK

300 phosphorylation. SIRT3 OE and vector control HepG2 cells were treated with AMPK

301 agonist AICAR (2.5 mM) for 4 h. Immunoblotting assay was performed for

302 phospho-AMPK.

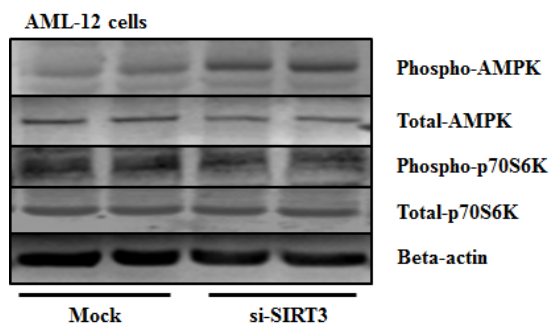

303

304 **Supplementary Fig. 16** Knocking-down SIRT3 activates AMPK/mTOR axis in

305 mouse hepatocytes. AML-12 mouse hepatocytes were transfected with siSIRT3 or

306 scramble siRNA. Total lysates were subjected to immunoblotting assay for

307 phosphorylated-AMPK and -p70S6K.

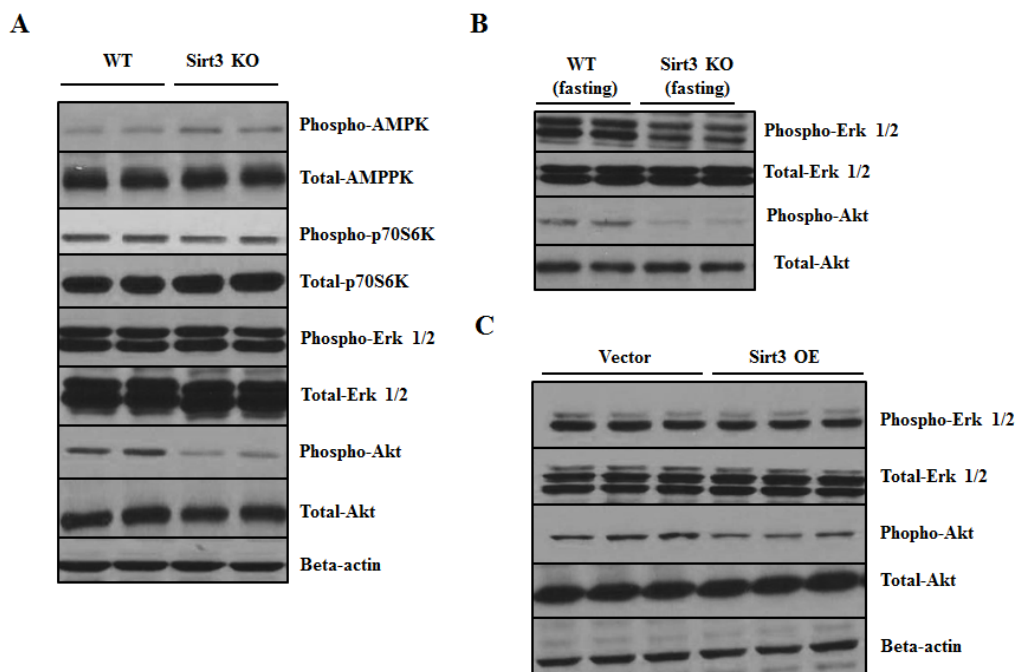

308

309 **Supplementary Fig. 17** Neither ERK1/2 nor Akt is regulated by SIRT3. Liver tissue  
 310 was collected from SIRT3 knock-out (KO) or wild type mice with or without 12 h  
 311 fasting (n = 5). (A) Phosphorylated-AMPK, -p70S6K, -ERK1/2, and -Akt expressions  
 312 were detected. (B) Phosphorylated-ERK1/2 and -Akt expressions were detected. (C)  
 313 Immunoblotting assay for phosphorylated-ERK1/2 and -Akt in SIRT3 OE and vector  
 314 control HepG2 cells.

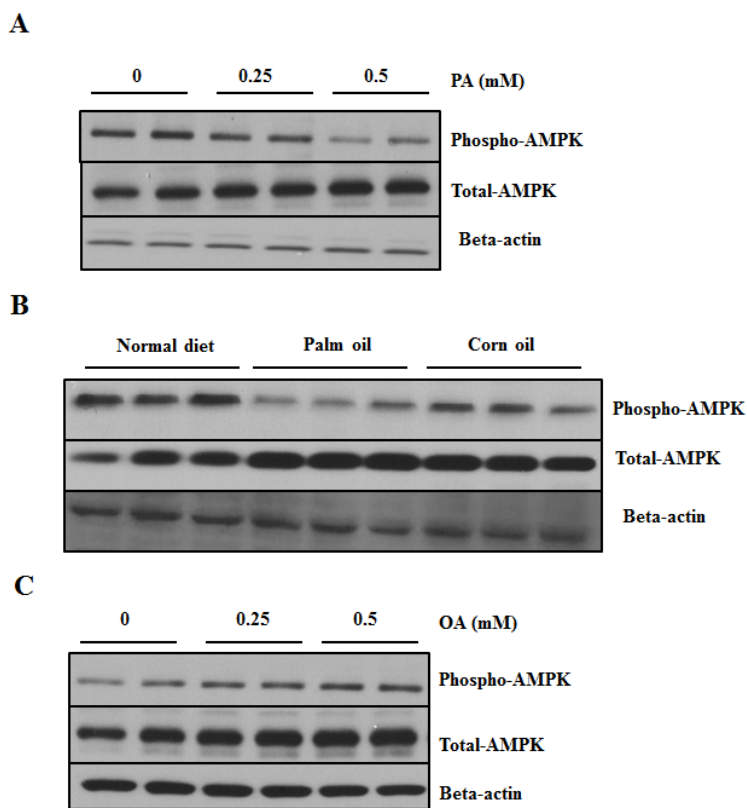

315

316 **Supplementary Fig. 18** SFAs down-regulates AMPK phosphorylation in the liver and

317 hepatocytes. Male C57BL/6 mice (8-week of age) were fed with normal or high-fat

318 diet using either palm oil or corn oil as fat source. Mice were sacrificed after 8-week

319 of feeding. Liver was collected for analysis. HepG2 cells were treated with PA or OA

320 for 12 h. Total cellular lysates from hepatocytes and liver tissues (n = 8) were

321 subjected to immunoblotting assay for phosphor-AMPK. (A) PA inhibits AMPK

322 phosphorylation in HepG2 cells. (B) Palm oil feeding inhibits AMPK phosphorylation.

323 (C) OA induces AMPK phosphorylation in HepG2 cells.

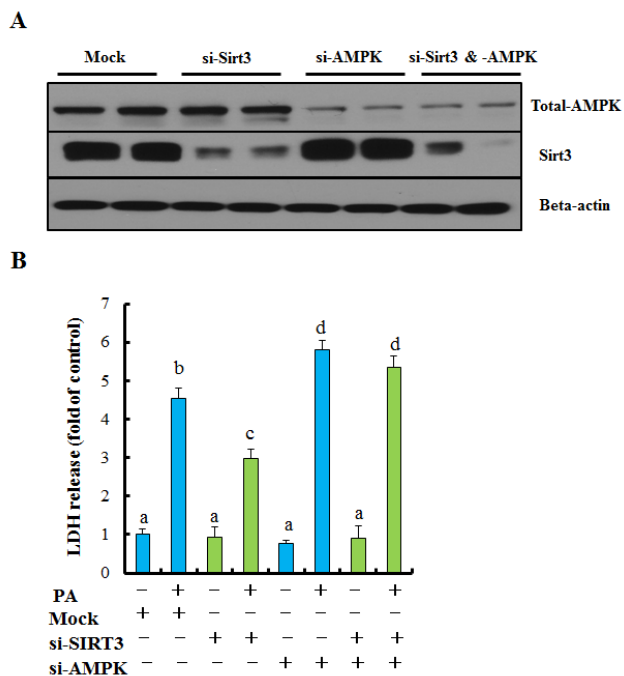

324

325 **Supplementary Fig. 19** Silencing AMPK inhibits knocking-down SIRT3-protected

326 lipotoxicity in HepG2 cells. HepG2 cells were co-transfected with siSIRT3 and

327 siAMPK, and were exposed to 0.5 mM PA for 12 h. (A) The transfected efficiency was

328 detected using Western-blotting. (B) Cell death was detected by LDH release. Values

329 are denoted as means  $\pm$  SD from three or more independent batches of cells. Bars with330 different characters differ significantly,  $p < 0.05$ .

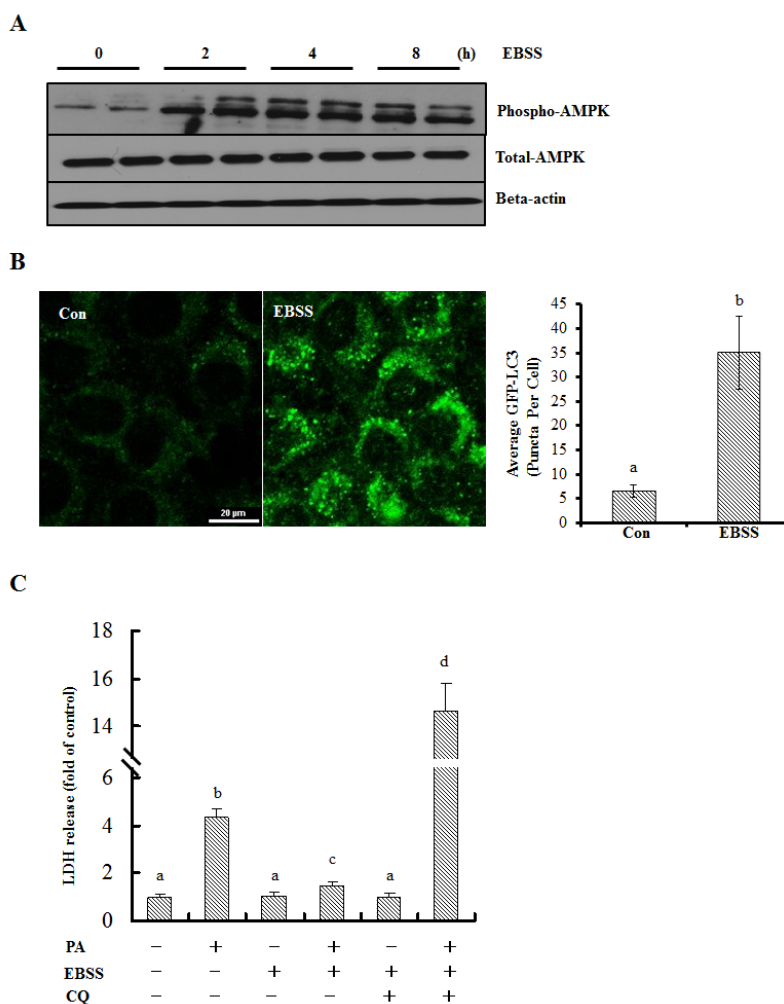

331

332 **Supplementary Fig. 20** EBSS protects against PA-induced lipotoxicity via activating

333 AMPK-regulated autophagy. (A) HepG2 cells were incubated in EBSS medium for the

334 indicated duration. Phosphorylated-AMPK expression was detected. (B) HepG2 cells

335 were transfected with recombinant adenovirus GFP-LC3 and treated with EBSS for 12

336 h. Puncta was detected. (C) HepG2 cells were treated with 0.5 mM PA for 12 h with or

337 without EBSS incubation. CQ (20  $\mu$ M) was added 1 h before PA treatment. Cell death338 was detected by the measurements of LDH release. Values are denoted as means  $\pm$  SD

339 from three or more independent batches of cells. Bars with different characters differ

340 significantly,  $p < 0.05$ .

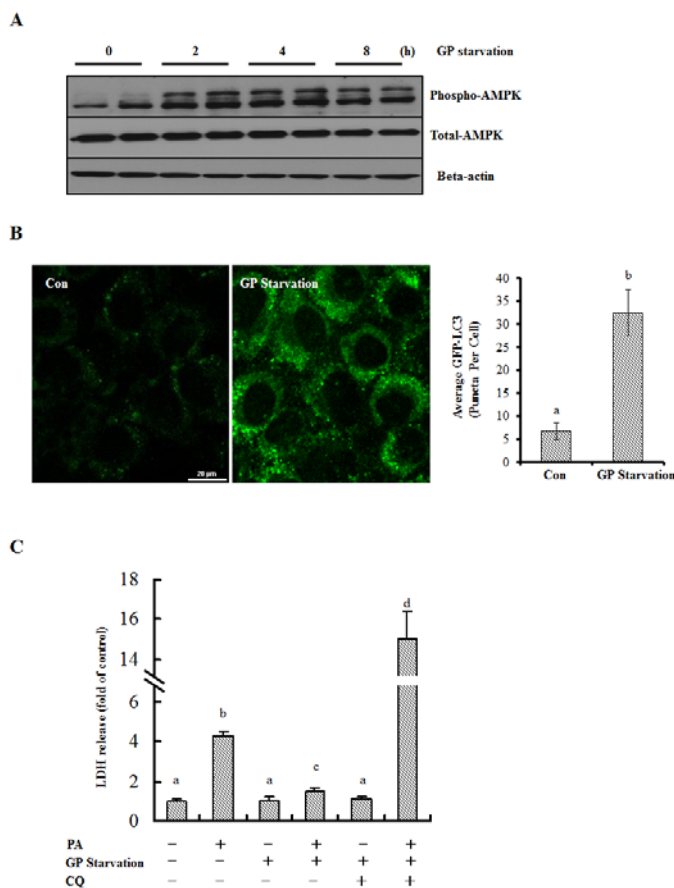

341

342 **Supplementary Fig. 21** GP starvation protects against PA-induced lipotoxicity via

343 activating AMPK-regulated autophagy. (A) HepG2 cells were incubated in GP

344 starvation (glucose, L-glutamine, pyruvate, and serum-depleted) medium for the

345 indicated duration. Phosphorylated-AMPK expression was detected. (B) HepG2 cells

346 were transfected with recombinant adenovirus GFP-LC3 and treated with GP

347 starvation medium for 12 h. Puncta was detected. (C) HepG2 cells were treated with

348 0.5 mM PA for 12 h with or without GP starvation incubation. CQ (20  $\mu$ M) was added

349 1 h before PA treatment. Cell death was detected by the measurements of LDH release.

350 Values are denoted as means  $\pm$  SD from three or more independent batches of cells.351 Bars with different characters differ significantly,  $p < 0.05$ .



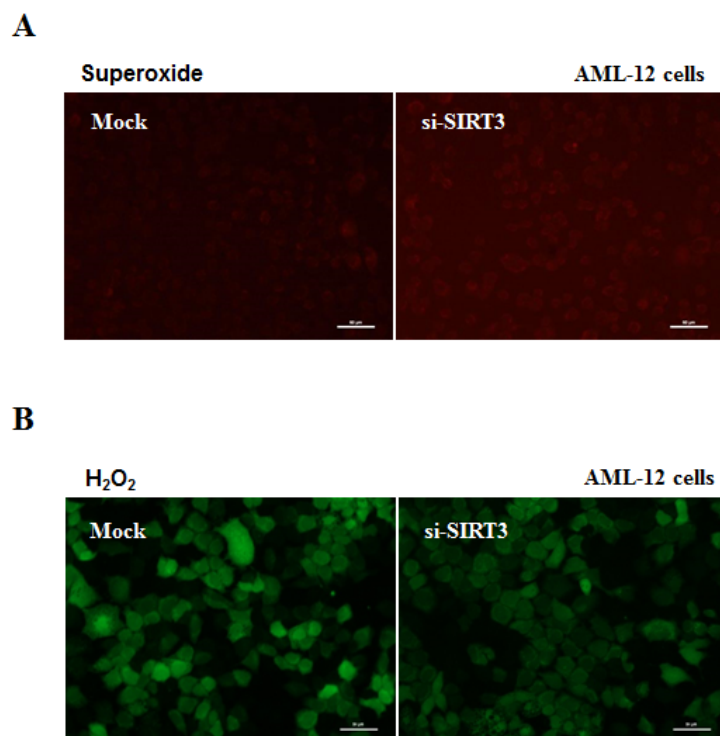

352

353 **Supplementary Fig. 22** Knocking-down SIRT3 regulates intracellular redox in mouse  
354 hepatocytes. AML-12 mouse hepatocytes were transfected with siSIRT3 or scramble  
355 siRNA. (A) Intracellular superoxide level was detected as described in the Material  
356 and methods. (B) Intracellular H<sub>2</sub>O<sub>2</sub> level was detected as described in the Material  
357 and methods.

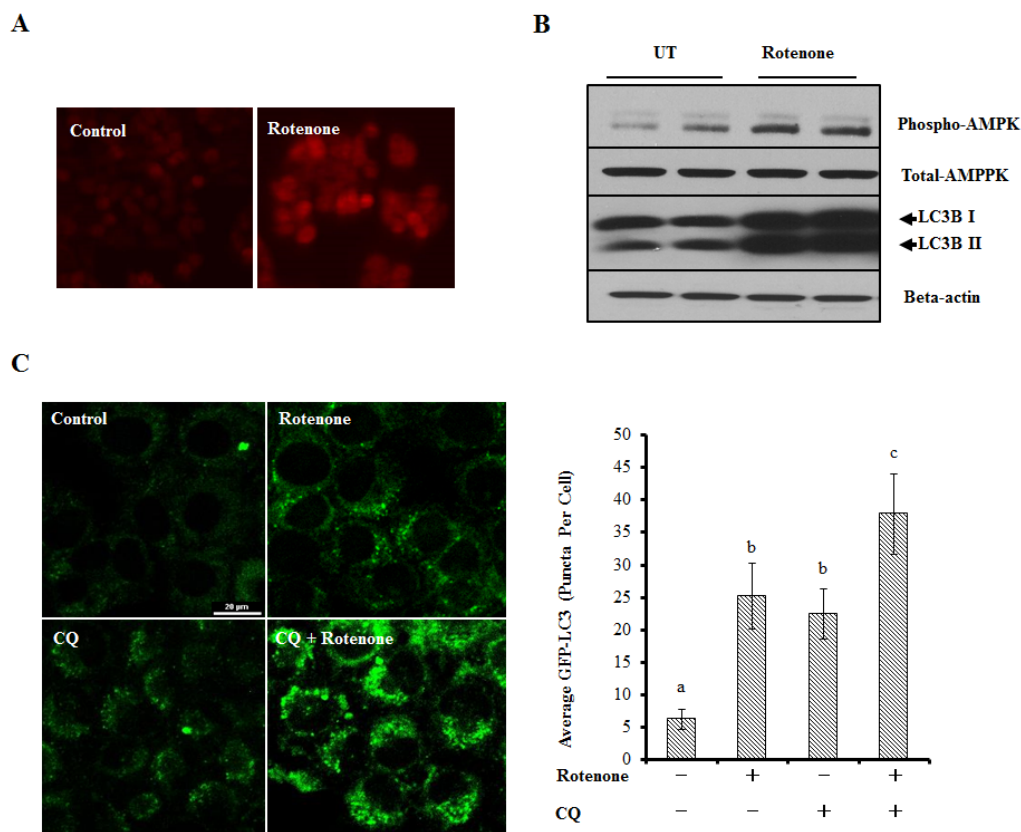

358

359 **Supplementary Fig. 23** Rotenone increases intracellular superoxide and stimulates  
 360 AMPK phosphorylation and autophagy. (A) HepG2 cells were treated with rotenone  
 361 (10 nM) for 12 h. Intracellular superoxide level was detected as described in the  
 362 Material and methods. (B) The expressions of phosphor-AMPK and LC3-II were  
 363 detected after 12 h rotenone (10 nM) treatment in HepG2 cells. (C) HepG2 cells were  
 364 transfected with recombinant adenovirus GFP-LC3 and treated with rotenone for 12 h.  
 365 CQ (20  $\mu$ M) was added 1 h before rotenone treatment. Puncta was detected. All values  
 366 are denoted as means  $\pm$  SD from three or more independent batches of cells. Bars with  
 367 different characters differ significantly,  $p < 0.05$ .

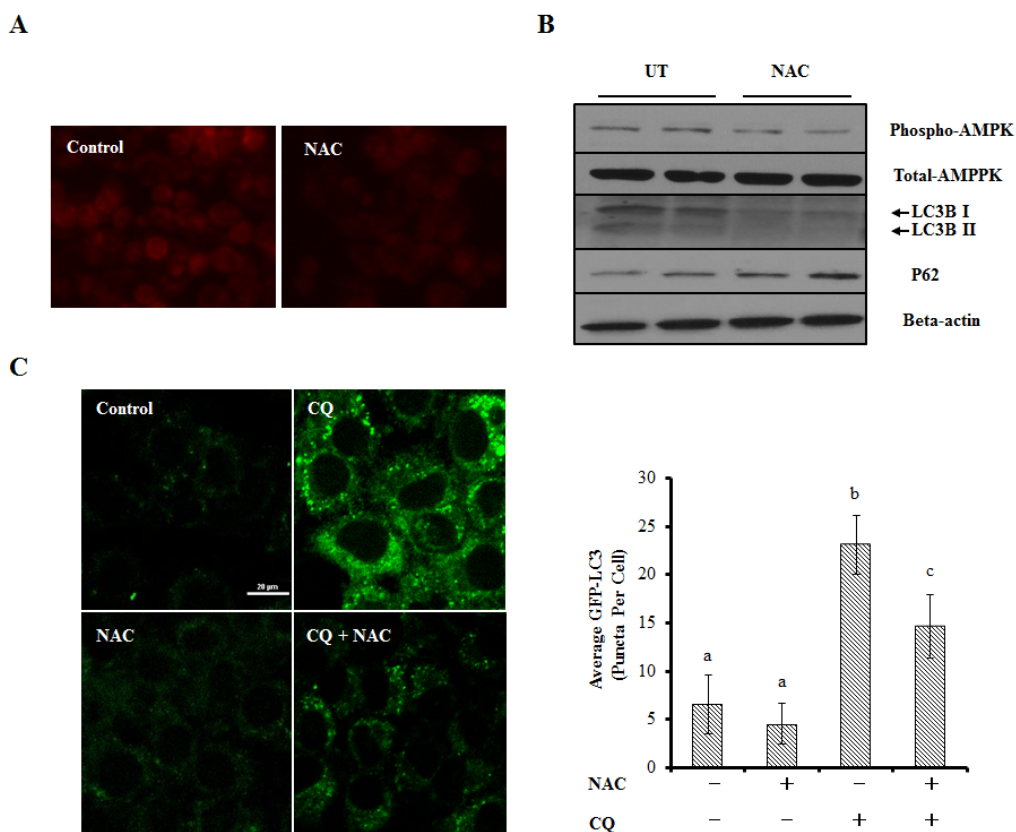

368

369 **Supplementary Fig. 24** NAC decreases intracellular superoxide and inhibits AMPK

370 phosphorylation and autophagy. (A) HepG2 cells were treated with NAC (5 mM) for

371 12 h. Intracellular superoxide level was detected as described in the Material and

372 methods. (B) The expressions of phosphor-AMPK, LC3-II, and p62 were detected

373 after 12 h NAC (5 mM) treatment in HepG2 cells. (C) HepG2 cells were transfected

374 with recombinant adenovirus GFP-LC3. NAC was added for 12 h with or without CQ

375 (20 μM) incubation. Puncta was detected. All values are denoted as means ± SD from

376 three or more independent batches of cells. Bars with different characters differ

377 significantly,  $p < 0.05$ .

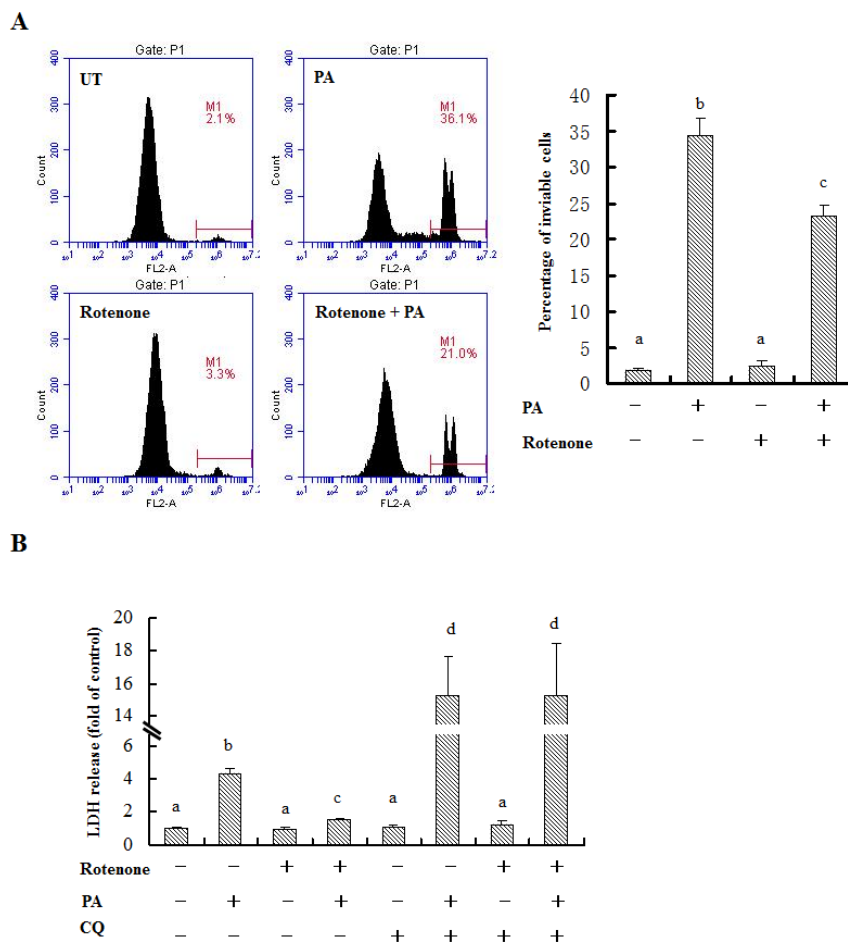

378

379 **Supplementary Fig. 25** Rotenone protects against PA-induced lipotoxicity via

380 activating autophagy. (A) HepG2 cells were treated with 0.5 mM PA for 12 h with or

381 without rotenone (10 nM) pre-treatment. Cell death was detected by propidium iodide

382 (PI) staining using flow cytometry. (B) HepG2 cells were treated with 0.5 mM PA for

383 12 h with or without rotenone (10 nM) pre-treatment. CQ (20  $\mu$ M) was added 1 h

384 before rotenone treatment. Cell death was detected by the measurements of LDH

385 release. Values are denoted as means  $\pm$  SD from three or more independent batches of386 cells. Bars with different characters differ significantly,  $p < 0.05$ .

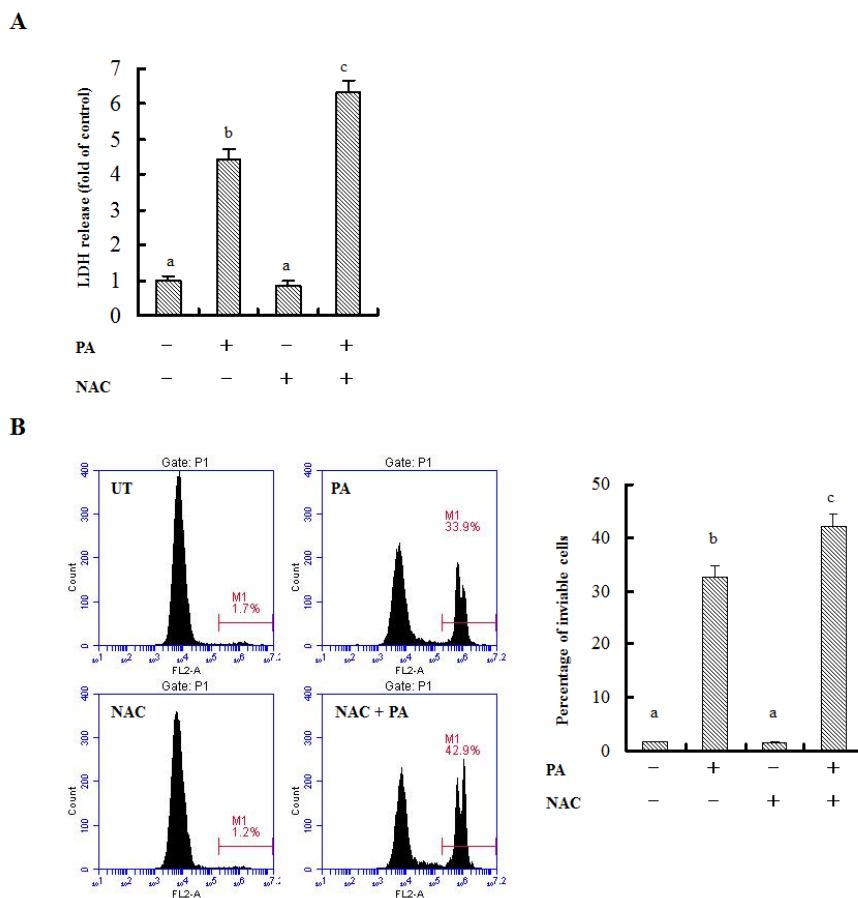

387

388 **Supplementary Fig. 26** NAC aggravates PA-induced lipotoxicity. HepG2 cells were  
 389 treated with 0.5 mM PA for 12 h with or without NAC (5 mM) pre-treatment. (A) Cell  
 390 death was detected by propidium iodide (PI) staining using flow cytometry. (B) Cell  
 391 death was detected by the measurements of LDH release. Values are denoted as means  
 392  $\pm$  SD from three or more independent batches of cells. Bars with different characters  
 393 differ significantly,  $p < 0.05$ .

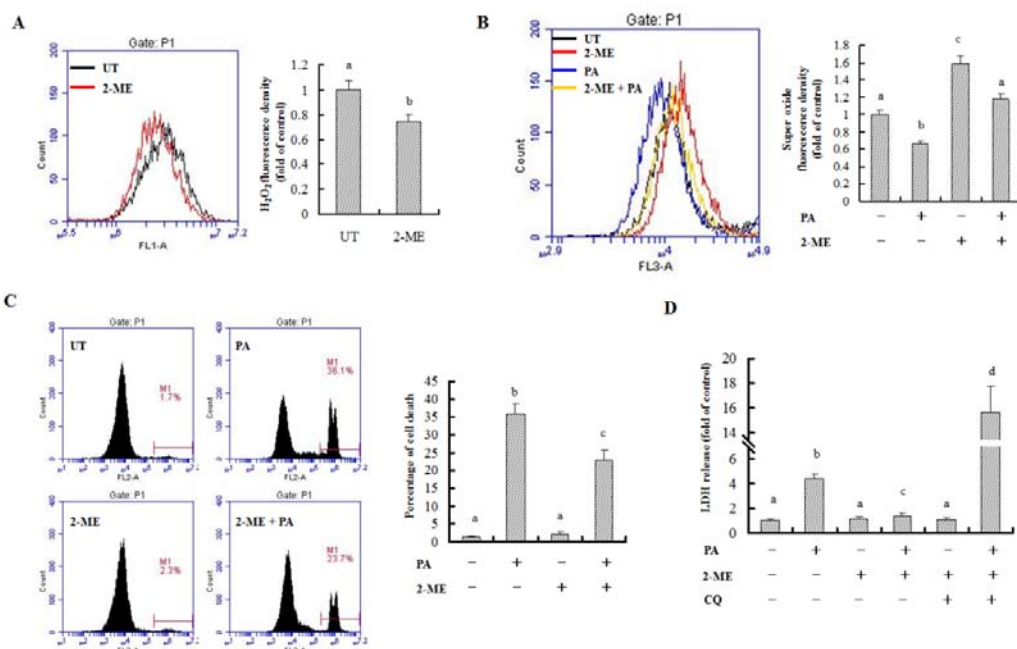

394

395 **Supplementary Fig. 27** Inhibiting MnSOD protects against PA-induced lipotoxicity

396 via activating autophagy. (A) HepG2 cells were treated with MnSOD inhibitor, 2-ME

397 (100  $\mu$ M), for 12 h. Intracellular hydrogen peroxide (H<sub>2</sub>O<sub>2</sub>) level was detected using

398 the method as described in the Material and methods. (B) HepG2 cells were treated

399 with 0.5 mM PA for 12 h with or without 2-ME pre-treatment. Intracellular

400 superoxide level was detected using the method as described in the Material and

401 methods. (C) HepG2 cells were treated with 0.5 mM PA for 12 h with or without

402 2-ME pre-treatment. Cell death was detected by propidium iodide (PI) staining using

403 flow cytometry. (D) HepG2 cells were treated with 0.5 mM PA for 12 h with or

404 without 2-ME pre-treatment. CQ (20  $\mu$ M) was added 1 h before 2-ME treatment. Cell

405 death was detected by the measurements of LDH release. All values are denoted as

406 means  $\pm$  SD from three or more independent batches of cells. Bars with different407 characters differ significantly,  $p < 0.05$ .

408

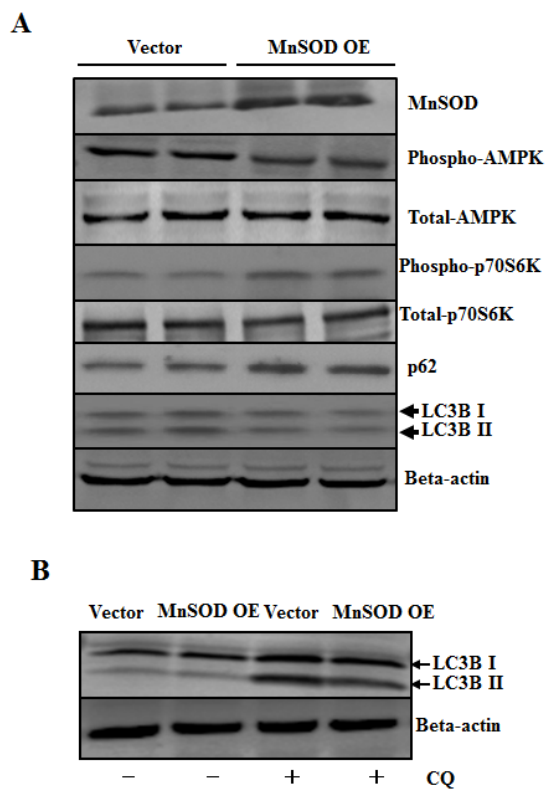

409

410 **Supplementary Fig. 28** Over-expressing MnSOD inhibits autophagic flux in HepG2

411 cells. HepG2 cells were transfected with recombinant lentivirus containing human

412 MnSOD or empty vector as control, and treated with or without CQ (20 μM) for 12 h.

413 (A) Immunoblotting assay was performed for MnSOD, phospho-AMPK, -p70s6k,

414 p62, and LC3 expressions in MnSOD OE or vector control cells. (B)

415 Immunoblotting assay was performed for LC3-II expression.

416

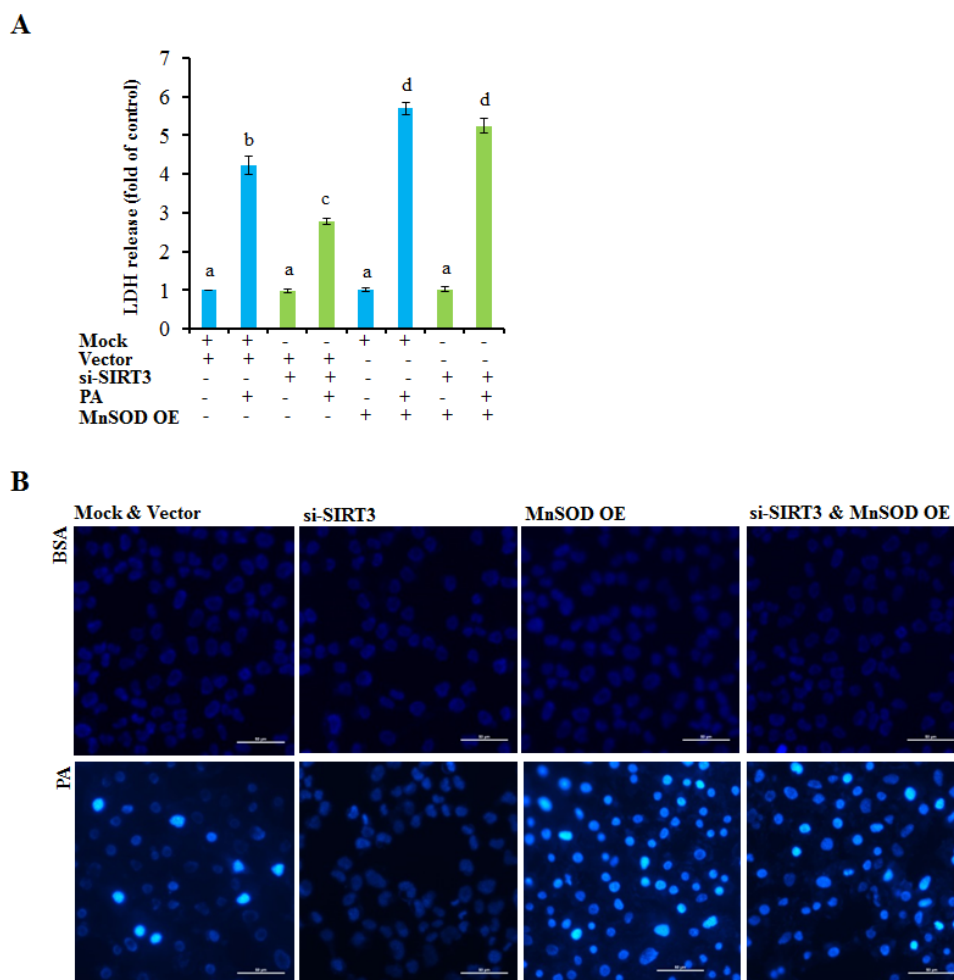

417

418 **Supplementary Fig. 29** Over-expressing MnSOD blocks knocking-down

419 SIRT3-protected lipotoxicity in HepG2 cells. HepG2 cells were co-transfected with

420 siRNA for SIRT3 and recombinant lentivirus containing human MnSOD or empty

421 vector as control, followed with 0.5 mM PA exposure for 12 h. Cell death was

422 detected by LDH release (A) and Hoechst staining (B), respectively. All values are

423 denoted as means  $\pm$  SD. Bars with different characters differ significantly,  $p < 0.05$ .

424

425



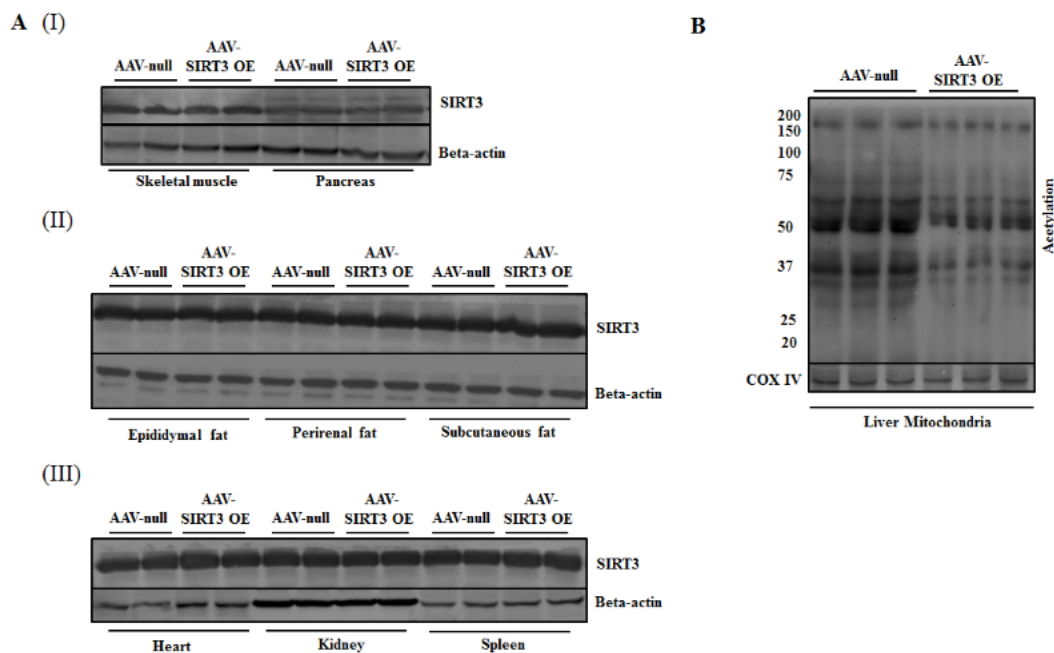

426

427 **Supplementary Fig. 30** SIRT3 protein expressions in different tissues from liver  
 428 specific SIRT3 over-expression mice. (A) Total lysates from different tissues (n = 8)  
 429 were subjected to immunoblotting assay for SIRT3. (B) Mitochondrial proteins were  
 430 extracted from liver tissues using a commercial Mitochondria Isolation kit (Beyotime,  
 431 China) for the measurement of acetylated proteins abundance.

432

---

**433 Reference**

- 434 1. Li S, Li J, Shen C, Zhang X, Sun S, Cho M, Sun C, et al. tert-Butylhydroquinone  
435 (tBHQ) protects hepatocytes against lipotoxicity via inducing autophagy  
436 independently of Nrf2 activation. *Biochim Biophys Acta* 2014;1841:22-33.
- 437 2. Law IK, Liu L, Xu A, Lam KS, Vanhoutte PM, Che CM, Leung PT, et al.  
438 Identification and characterization of proteins interacting with SIRT1 and SIRT3:  
439 implications in the anti-aging and metabolic effects of sirtuins. *Proteomics*  
440 2009;9:2444-2456.
- 441 3. Mizushima N, Yoshimori T, Levine B. Methods in mammalian autophagy  
442 research. *Cell* 2010;140:313-326.
- 443 4. Dou X, Li S, Wang Z, Gu D, Shen C, Yao T, Song Z. Inhibition of NF-kappaB  
444 activation by 4-hydroxynonenal contributes to liver injury in a mouse model of  
445 alcoholic liver disease. *Am J Pathol* 2012;181:1702-1710.
- 446 5. Chen Y, Azad MB, Gibson SB. Superoxide is the major reactive oxygen species  
447 regulating autophagy. *Cell Death Differ* 2009;16:1040-1052.

448

449
